# Supplementary material for: Preoperative Apparent Diffusion Coefficient Values for Differentiation between Low and High Grade Meningiomas: An Updated Systematic Review and Meta-Analysis
Source: MDPI journal article supplement (doi:10.3390/diagnostics12030630), 2022-03-04
Supplement: s1 [file s1]

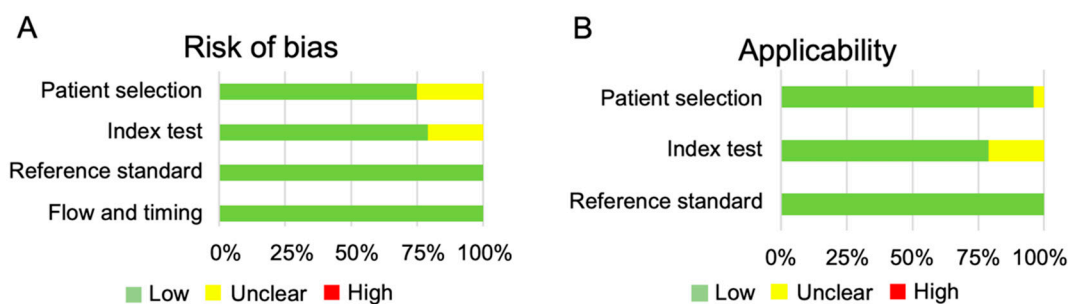

**Supplementary Figure S1.** Quality assessment of all included studies. Most studies showed an overall low risk of bias

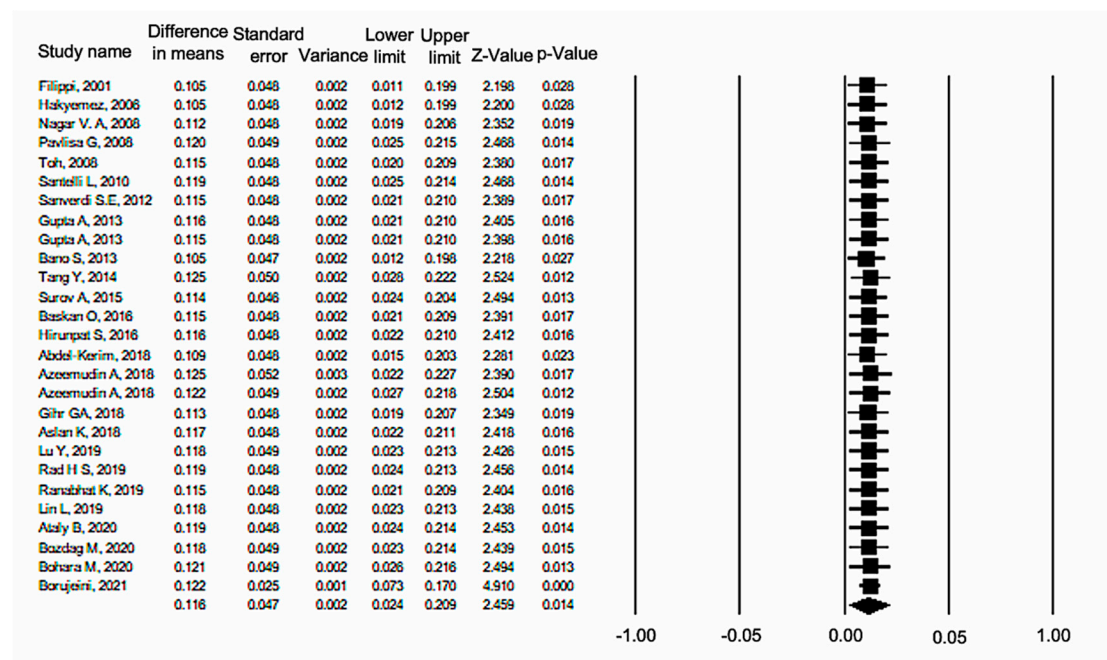

**Supplementary Figure S2.** Sensitivity study. The differences in mean ADC values did not vary markedly with removal of each study, indicating that the data were not overly influenced by each study.
